# Supplementary material
Source: Springer Nature journal article supplement (https://www.springermedizin.de/resource/supplementary/12958_2009_515_MOESM3_ESM.pdf/9568196)

**A**

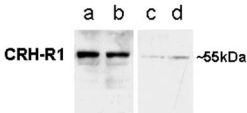

**B**

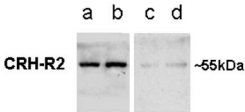

Supplement: MOESM3 [file 9568196]
